# Supplementary material
Source: Royal Society of Chemistry journal article supplement (doi:10.1039/d6qi00806b)
Supplement: d6qi00806b1.pdf [file d6qi00806b1.pdf]

## Supporting Information

### **Biomass-derived N-doped lamellar hierarchically porous carbon for high-performance Li-Se batteries**

Yi-Xun Liu <sup>a</sup>, Yu-Ting Xiong <sup>b</sup>, Lin-Dong Wang <sup>a, c</sup>, Yi-Qi Fan <sup>a</sup>, Liang Wu<sup>d\*</sup>, Hemdan S. H. Mohamed <sup>e</sup>, Zhi-Yi Hu <sup>a, c\*</sup>, Yu Li <sup>a\*</sup>, Bao-Lian Su <sup>a, f\*</sup>

<sup>a</sup> State Key Laboratory of Advanced Technology for Materials Synthesis and Processing, Wuhan University of Technology, 122 Luoshi Road, 430070 Wuhan, Hubei, China.

<sup>b</sup> College of Art and Design, Hubei University, 368 Friendship Avenue, 430062 Wuhan, Hubei, China.

<sup>c</sup> Nanostructure Research Centre (NRC), Wuhan University of Technology, 122 Luoshi Road, 430070 Wuhan, Hubei, China.

<sup>d</sup> School of Automotive Engineering, Xiangyang Polytechnic, 18 Longzhong Road, 441050, Xiangyang, Hubei, China.

<sup>e</sup> Physics Department, Faculty of Science, Fayoum University, El Gomhoria Street, 63514 Fayoum, Egypt.

<sup>f</sup> Laboratory of Inorganic Materials Chemistry (CMI), University of Namur, 61 rue de Bruxelles, 5000 Namur, Belgium.

\* Corresponding authors. Email: [liangwu@whut.edu.cn](mailto:liangwu@whut.edu.cn) (L. Wu), [zhiyi.hu@whut.edu.cn](mailto:zhiyi.hu@whut.edu.cn) (Z. Y. Hu), [yu.li@whut.edu.cn](mailto:yu.li@whut.edu.cn) (Y. Li) and [bao-lian.su@unamur.be](mailto:bao-lian.su@unamur.be) (B.L. Su)

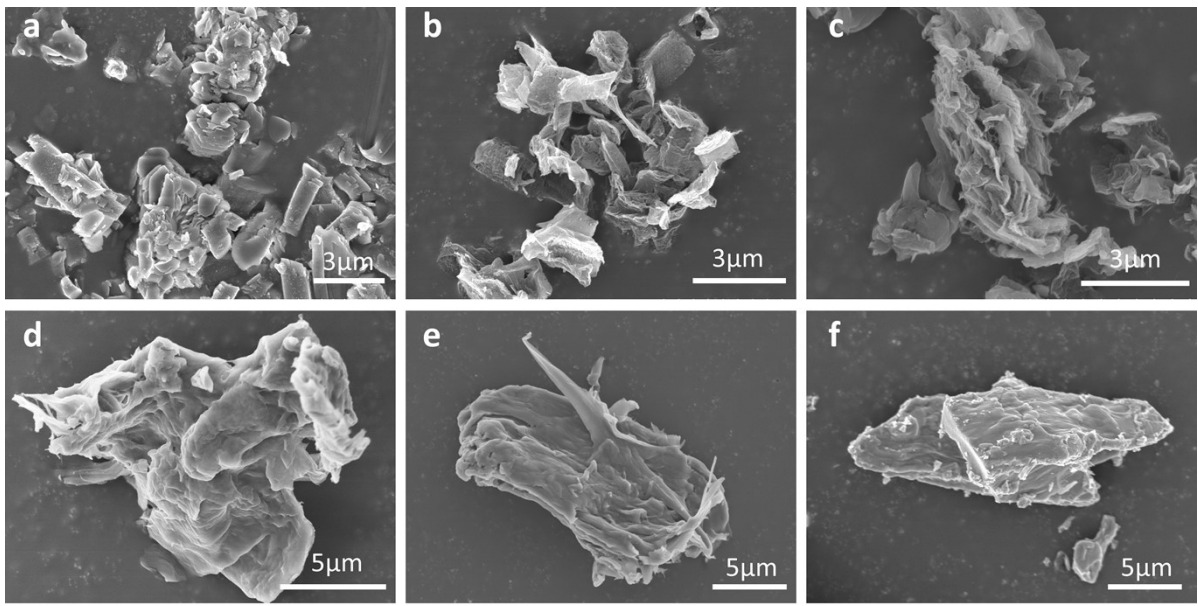

**Fig. S1** SEM images of (a) CEL/GU-HTC, (b) NPC, (c) Se@NPC, (d) CEL-HTC, (e) PC and (f) Se@PC, respectively.

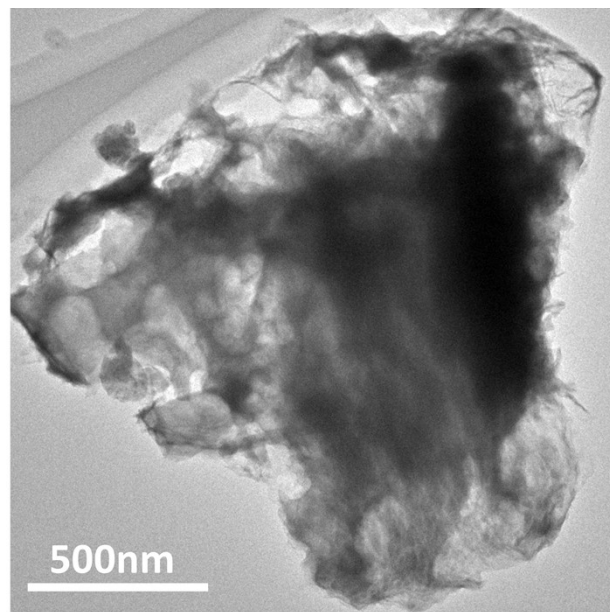

**Fig. S2** TEM image of Se@NLPC-P.

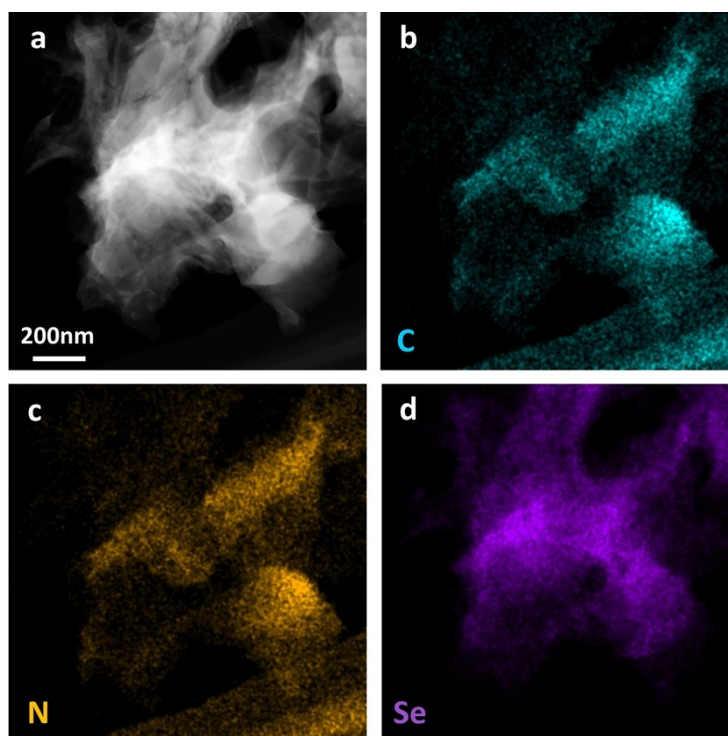

**Fig. S3** (a) HAADF-STEM image and (b-d) elemental distribution of Se@NPC.

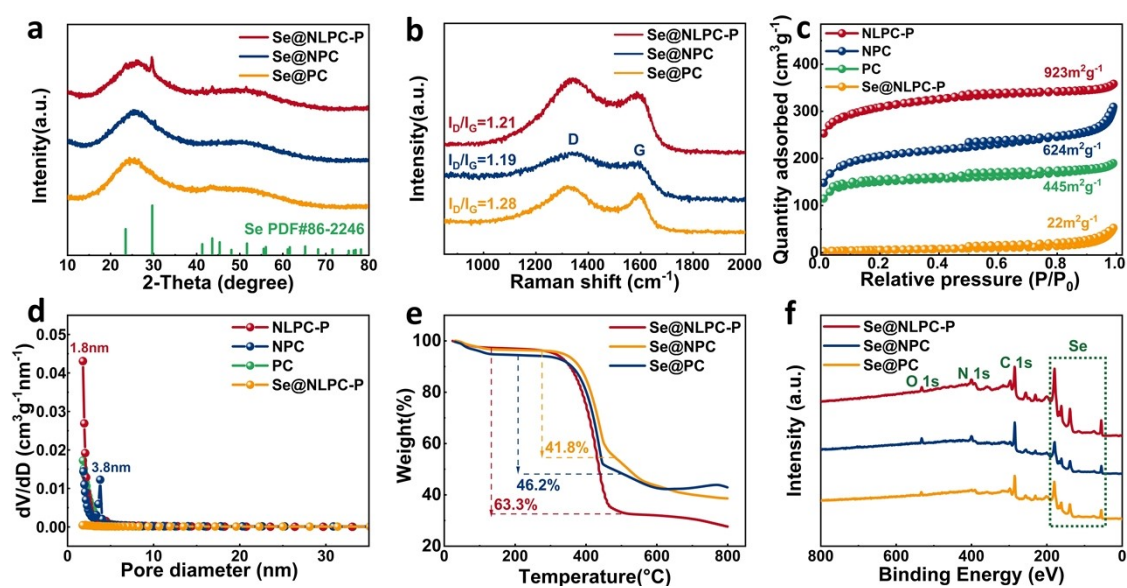

**Fig. S4** (a) XRD patterns, (b) Raman spectra, (c) N<sub>2</sub> adsorption-desorption isotherms, (d) pore-size distribution curves, (e) TGA curves and (f) survey XPS spectra of Se@NLPC-P, Se@NPC, and Se@PC, respectively.

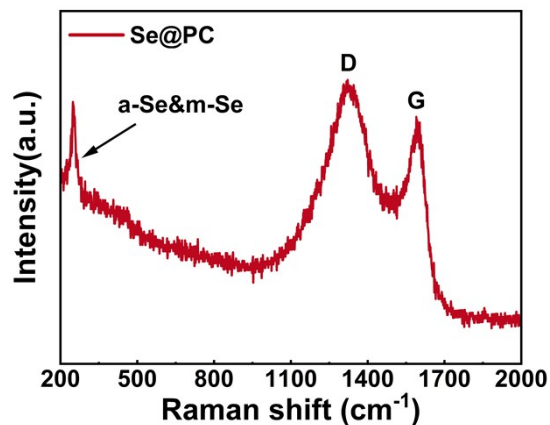

Fig. S5 Raman spectrum of Se@NLPC-P in 200-2000  $\text{cm}^{-1}$ .

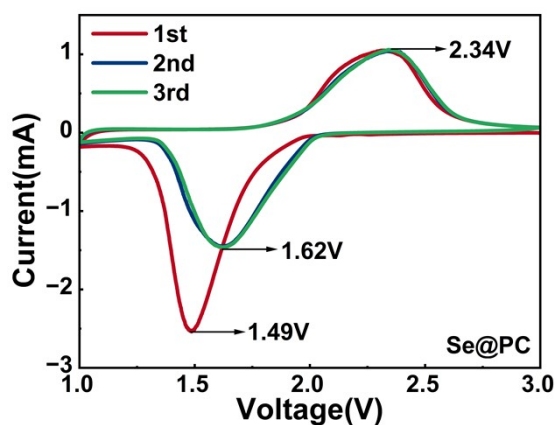

Fig. S6 CV curves of Se@PC at the scan rate of  $0.2 \text{ mV s}^{-1}$ .

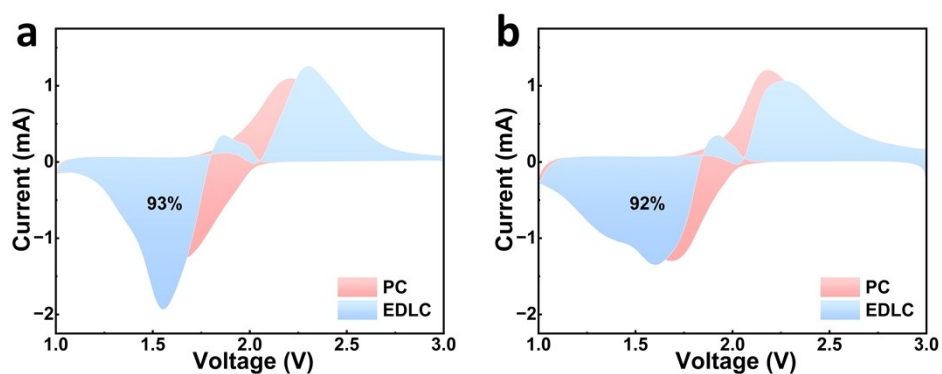

Fig. S7 Capacitive contribution at the scan rate of  $0.5 \text{ mV s}^{-1}$  of (a) Se@NLPC-P and (b) Se@NPC, respectively.

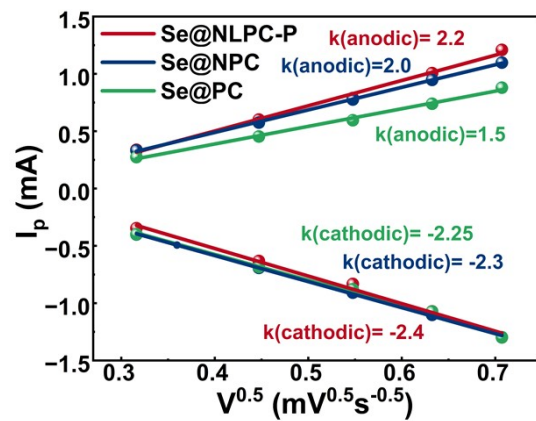

**Fig. S8** Linear fitting of peak currents versus square root of the scan rates.

**Table S1** The electrochemical performances of our sample with the reported Se/C composites.

| Cathode materials | Current rate (C) | Cycle number (n) | Reversible capacity (mAh·g <sup>-1</sup> ) | References       |
|-------------------|------------------|------------------|--------------------------------------------|------------------|
| <b>Se @NLPC-P</b> | <b>0.5</b>       | <b>500</b>       | <b>578</b>                                 | <b>This work</b> |
|                   | <b>5</b>         | <b>500</b>       | <b>485</b>                                 |                  |
| Se/C              | 0.15             | 250              | 430                                        | [1]              |
| Se/HPNC           | 1                | 500              | 410                                        | [2]              |
| Se@NPC-NS         | 0.5              | 225              | 585                                        | [3]              |
| Se@NHCS           | 0.5              | 1000             | 443                                        | [4]              |
| Se@CNTs@MP<br>C   | 0.1              | 100              | 596                                        | [5]              |
| Se/CNTs           | 1                | 500              | 440                                        | [6]              |
| APPC/Se@PDA       | 5                | 1400             | 500                                        | [7]              |
| Se/Co-NC          | 1                | 200              | 480                                        | [8]              |
| Se@LHPC           | 0.5              | 450              | 500                                        | [9]              |

## References

- (1) C Luo, J J Wang, L M Suo, J F Mao, X L Fan and C S Wang, In situ formed carbon bonded and encapsulated selenium composites for Li-Se and Na-Se batteries, *J. Mater. Chem. A*, 2015, **3**, 555-561.
- (2) W N Deng, Y H Li, D F Xu, W Zhou, K X Xiang and H Chen, Three-dimensional hierarchically porous nitrogen-doped carbon from water hyacinth as selenium host for high-performance lithium-selenium batteries, *Rare Met.*, 2022, **41**, 3432-3445.
- (3) X W Luo, M R Zhou, M J Ran, D X Xun, J L He, Z Y Hu, H S H Mohamed, J Liu, L H Chen, Y Li and B L Su, 2D ZIF-8 derived N-doped porous carbon nanosheets for high-performance Li-Se batteries, *Chem. Eng. J.*, 2024, **488**, 150885.
- (4) B Kalimuthu and K Nallathamby, Designed Formulation of Se-Impregnated N-Containing Hollow Core Mesoporous Shell Carbon Spheres: Multifunctional Potential Cathode for Li-

Se and Na-Se Batteries, *ACS Appl. Mater. Interfaces*, 2017, **9**, 26756-26770.

- (5) S Xin, L Yu, Y You, H P Cong, Y X Yin, X L Du, Y G Guo, S H Yu, Y Cui and J B Goodenough, The Electrochemistry with Lithium versus Sodium of Selenium Confined To Slit Micropores in Carbon, *Nano Lett.*, 2016, **16**, 4560-4568.
- (6) N Feng, K Xiang, L Xiao, W Chen, Y Zhu, H Liao and H Chen, Se/CNTs microspheres as improved performance for cathodes in Li-Se batteries, *J. Alloy. Compd.*, 2019, **786**, 537-543.
- (7) Y Q Cao, F F Lei, Y L Li, S L Qiu, Y Wang, W Zhang and Z T Zhang, A MOF-derived carbon host associated with Fe and Co single atoms for Li-Se batteries, *J. Mater. Chem. A*, 2021, **9**, 16196-16207.
- (8) F Gao, X A Yue, X Y Xu, P Xu, F Zhang, H S Fan, Z L Wang, Y T Wu, X Liu and Y Zhang, A N/Co co-doped three-dimensional porous carbon as cathode host for advanced lithium-selenium batteries, *Rare Metals*, 2023, **42**, 2670-2678.
- (9) P F Lu, F Y Liu, F Zhou, J Q Qin, H D Shi and Z S Wu, Lignin derived hierarchical porous carbon with extremely suppressed polyselenide shuttling for high-capacity and long-cycle-life lithium-selenium batteries, *J. Energy Chem.*, 2021, **55**, 476-483.
